# Supplementary material for: IL15 Trispecific Killer Engagers (TriKE) Make Natural Killer Cells Specific to CD33+ Targets While Also Inducing Persistence, In Vivo Expansion, and Enhanced Function
Source: Oxford University Press journal article supplement (doi:10.1158/1078-0432.ccr-15-2710), 2016-02-04
Supplement: 10780432ccr152710-sup-157477_1_supp_3319747_519smv.docx [file 10780432ccr152710-sup-157477_1_supp_3319747_519smv.docx]

Supplementary Table 1. BiKE and TriKE selectivity bind their appropriate targets as determined by flow cytometry

Reagent Target Amount (ug) % Positive Cells

Unstained HL-60 - 0.1

161533-FITC HL-60 10 63

161533-FITC HL-60 20 75

161533-FITC HL-60 40 78

161533-FITC HT-29 10 4

EpCAM-FITC HL-60 20 1.4

EpCAM-FITC HT-29 2 100

1633-FITC HT-29 4 1

1633-FITC HL-60 4 62

1633-FITC HL-60 15 74

16-FITC HL-60 20 0.1

33-FITC HL-60 20 98

Directly FITC-labeled 1633 BiKE and 161533 TriKE were incubated with CD33+ HL-60 cells and CD33- HT29 cells at various concentrations in order to show specificity for appropriate targets.
